# Supplementary material for: Pulmonary hypertension with warm hands
Source: PubMed Central journal article supplement — Thorax. 2017 May 5;72(12):1164–6. doi: 10.1136/thoraxjnl-2017-209982 (PMC5738541; doi:10.1136/thoraxjnl-2017-209982), 2017-05-05
Supplement: thoraxjnl-2017-209982supp001.pdf [file thoraxjnl-2017-209982supp001.pdf]

**Supplementary data:**

**Supplementary table 1: Cardiac Magnetic Imaging at presentation in 2014**

|                                                    |     |
|----------------------------------------------------|-----|
| <b>Left Ventricular End Diastolic Volume (mL)</b>  | 131 |
| <b>Left Ventricular End Systolic Volume (mL)</b>   | 63  |
| <b>Left Ventricular Stroke Volume (mL)</b>         | 68  |
| <b>Left Ventricular Ejection Fraction (%)</b>      | 52  |
| <b>Right Ventricular End Diastolic Volume (mL)</b> | 137 |
| <b>Right Ventricular End Systolic Volume (mL)</b>  | 72  |
| <b>Right Ventricular Stroke Volume (mL)</b>        | 65  |
| <b>Right Ventricular Ejection Fraction (%)</b>     | 47  |

**Supplementary table 2: Right Heart Catheterizations at serial time points**

|                                                                 | <b>At presentation<br/>(2014)</b> | <b>Under PAH specific<br/>medication (2016)</b> | <b>After stopping PAH<br/>specific medication (2016)</b> |
|-----------------------------------------------------------------|-----------------------------------|-------------------------------------------------|----------------------------------------------------------|
| <b>Systolic Pulmonary Artery<br/>Pressure (mmHg)</b>            | 82                                | 56                                              | 65                                                       |
| <b>Diastolic Pulmonary Artery<br/>Pressure (mmHg)</b>           | 40                                | 23                                              | 30                                                       |
| <b>Mean Pulmonary Artery<br/>Pressure (mmHg)</b>                | 56                                | 37                                              | 42                                                       |
| <b>Mean Right Atrial Pressure<br/>(mmHg)</b>                    | 13                                | 11                                              | 6                                                        |
| <b>Arterial Blood Pressure<br/>(mmHg)</b>                       | 92/64                             | 100/56                                          | 106/77                                                   |
| <b>Cardiac Output<br/>(l/min)</b>                               | 6.5                               | 13.0                                            | 8.3                                                      |
| <b>Pulmonary Vascular<br/>Resistance (dyn·s/cm<sup>5</sup>)</b> | 492                               | 176                                             | 270                                                      |
| <b>Systemic Vascular Resistance<br/>(dyn·s/cm<sup>5</sup>)</b>  | 742                               | 367                                             | 777                                                      |
| <b>Pulmonary Arterial Wedge<br/>Pressure (mmHg)</b>             | 16                                | 15                                              | 15                                                       |
| <b>Mixed Venous Oxygen<br/>Saturation (SvO2 %)</b>              | 82                                | 87                                              | 87                                                       |
| <b>Arterial Oxygen Saturation<br/>(SpO2 %)</b>                  | 96                                | 98                                              | 99                                                       |
| <b>New York Heart Association<br/>(NYHA) Class</b>              | 3                                 | 1                                               | 1                                                        |

**Supplementary table 3: Laboratory results at presentation and during treatment**

|                                            | <b>At presentation<br/>(2014)</b> | <b>During PAH specific treatment<br/>(2016)</b> |
|--------------------------------------------|-----------------------------------|-------------------------------------------------|
| <b>Haemoglobin (g/dL)</b>                  | 16.0                              | 17.1                                            |
| <b>Haematocrit (%)</b>                     | 57                                | 57                                              |
| <b>Mean corpuscular volume (fl)</b>        | 72                                |                                                 |
| <b>Thrombocytes (x 10<sup>9</sup>/L)</b>   | 118                               | 101                                             |
| <b>Leukocytes (x 10<sup>9</sup>/L)</b>     | 4.6                               | 3.8                                             |
| <b>Reticulocytes index (%)</b>             | 18                                |                                                 |
| <b>Erythropoeitin (mIU/ml)</b>             | 9232                              | 18600                                           |
| <b>Bilirubin (umol/L)</b>                  | 22                                | 9                                               |
| <b>Alkaline phosphatase (U/L)</b>          | 71                                | 54                                              |
| <b>Gamma glutamyl transpeptidase (U/L)</b> | 30                                | 26                                              |
| <b>Lactate dehydrogenase (U/L)</b>         | 546                               | 302                                             |
| <b>Iron (umol/L)</b>                       | 6.2                               | 6.0                                             |
| <b>Transferrin saturation (g/L)</b>        | 2.3                               | 2.2                                             |
| <b>Ferritin (ug/L)</b>                     | 7                                 | 11                                              |
| <b>Creatinin (mmol/Lumol/L)</b>            | 44                                | 47                                              |
| <b>NT-pro-BNP* (pg/mL)</b>                 | 196                               | 155                                             |

**\*N-Terminal of Brain-type Natiuretic Peptide**
